# Supplementary material for: Rac1 controls cell turnover and reversibility of the involution process in postpartum mammary glands
Source: PubMed Central journal article supplement (PMC9851507; doi:10.1371/journal.pbio.3001583), 2023-01-19
Supplement: pbio.3001583.s001.pdf [file pbio.3001583.s001.pdf]

Involution day 4

RER 459

WT

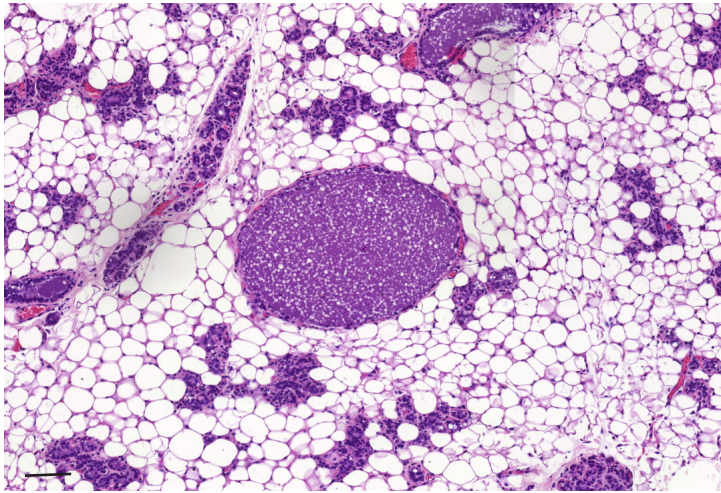

RW495

*Rac1*<sup>-/-</sup>

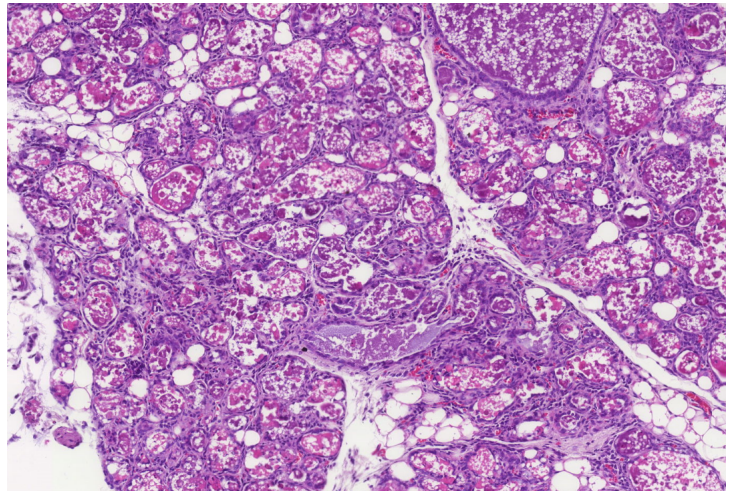

RW520

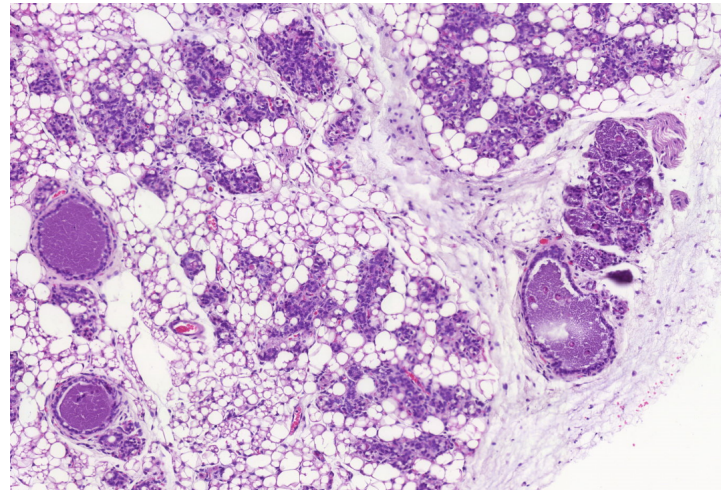

RW498

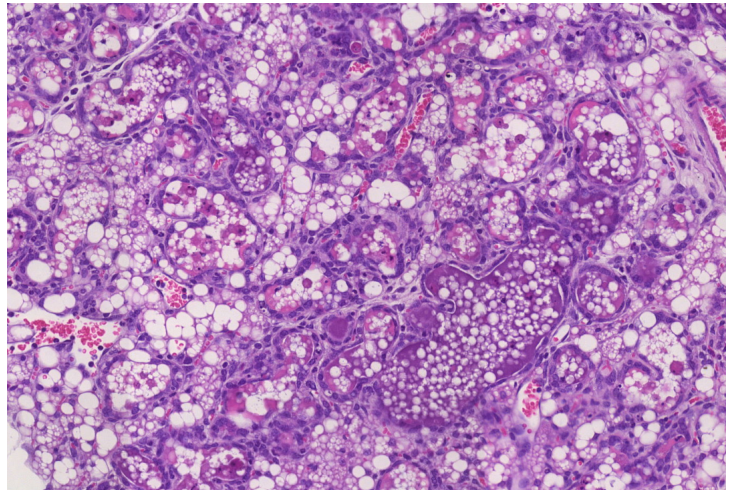

RW517

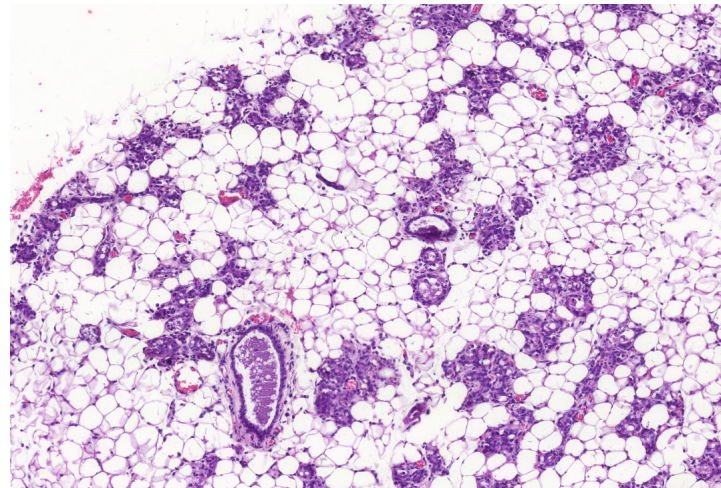

RW 521

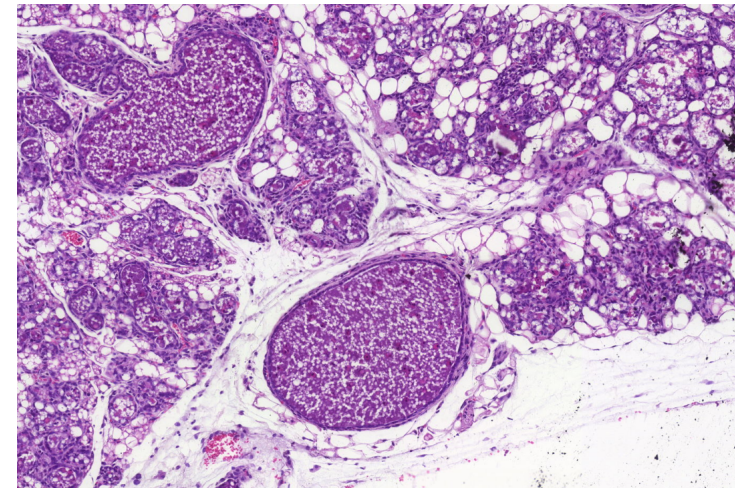

S1 Fig
