# Supplementary material for: Rac1 controls cell turnover and reversibility of the involution process in postpartum mammary glands
Source: PubMed Central journal article supplement (PMC9851507; doi:10.1371/journal.pbio.3001583), 2023-01-19

Lactation D1 2nd gestation

**A**

WT

*Rac1*<sup>-/-</sup>

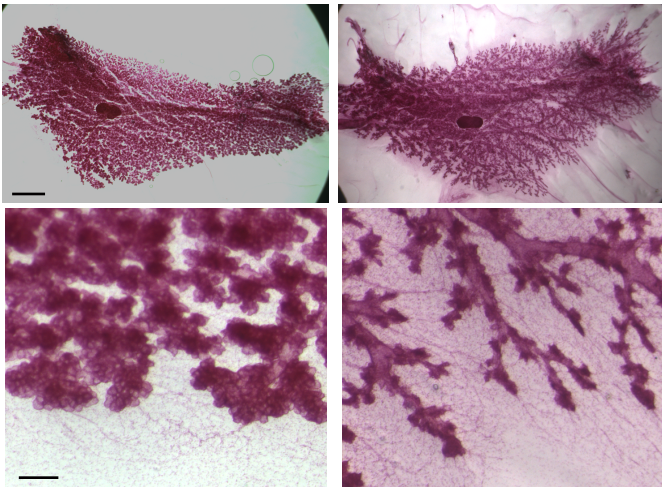

Lactation D2 2nd gestation

**B**

WT

*Rac1*<sup>-/-</sup>

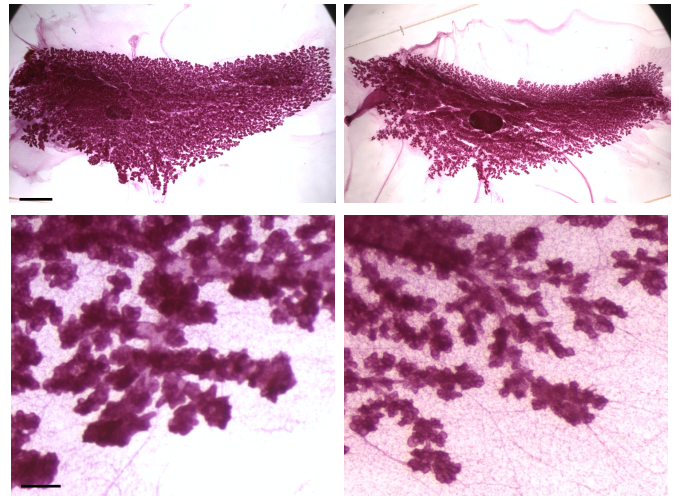

Supplement: pbio.3001583.s003.pdf [file pbio.3001583.s003.pdf]
