# Supplementary material for: Rac1 controls cell turnover and reversibility of the involution process in postpartum mammary glands
Source: PubMed Central journal article supplement (PMC9851507; doi:10.1371/journal.pbio.3001583), 2023-01-19

Involution day 2

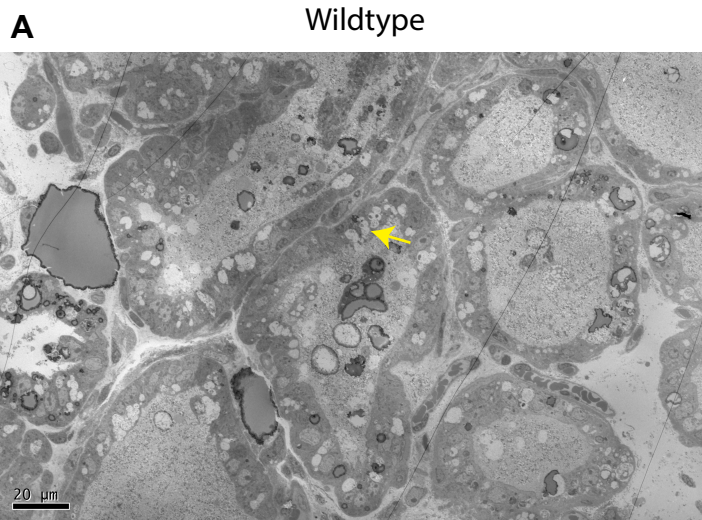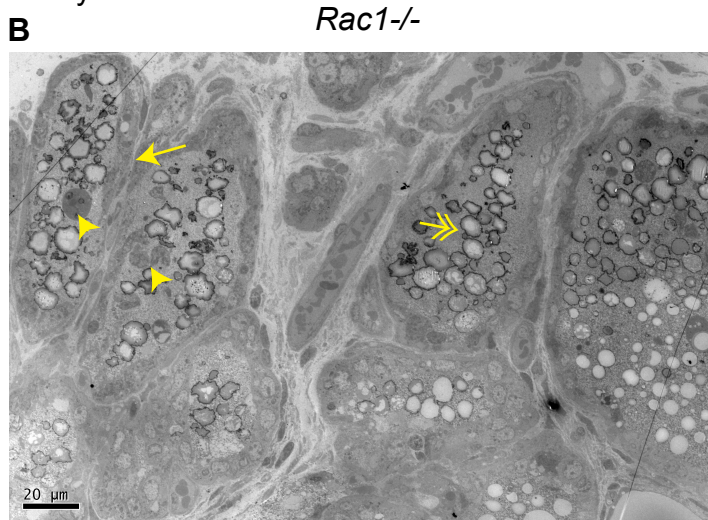

Involution day 4

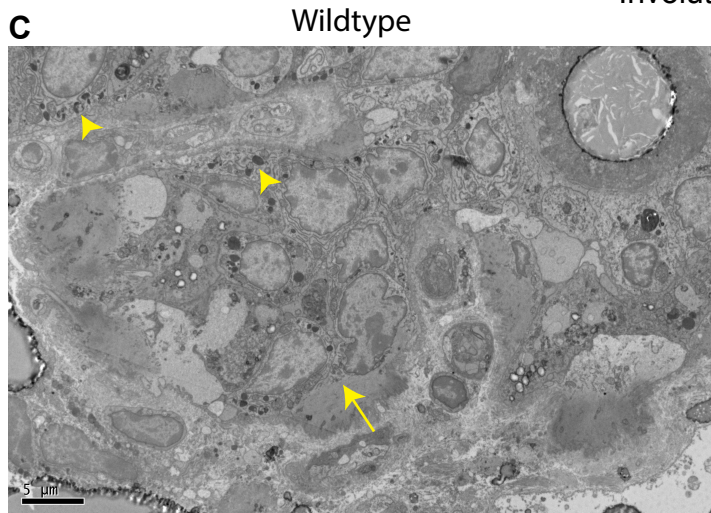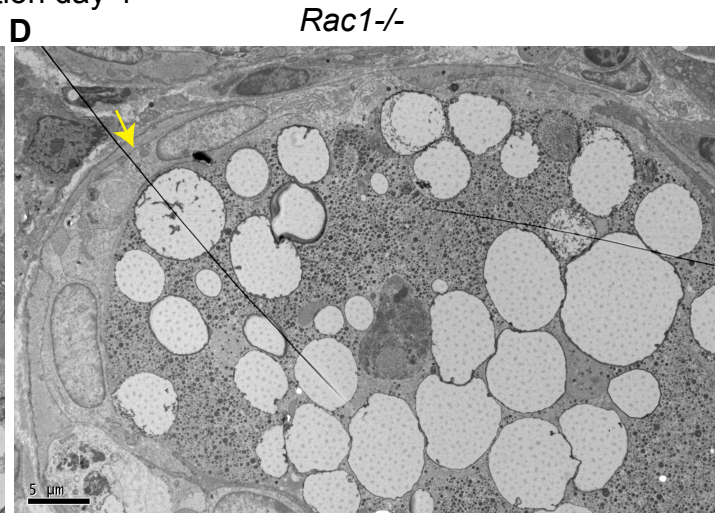

Supplement: pbio.3001583.s004.pdf [file pbio.3001583.s004.pdf]
