# Supplementary material for: Rac1 controls cell turnover and reversibility of the involution process in postpartum mammary glands
Source: PubMed Central journal article supplement (PMC9851507; doi:10.1371/journal.pbio.3001583), 2023-01-19
Supplement: pbio.3001583.s005.pdf [file pbio.3001583.s005.pdf]

| Gene    | Gene description                   | FC    | P-Value  |
|---------|------------------------------------|-------|----------|
| Ctsd    | cathepsin D                        | -1.72 | 2.44E-02 |
| Ctsb    | cathepsin B                        | -2.51 | 2.75E-02 |
| Ctsa    | cathepsin A                        | -2.50 | 2.79E-02 |
| Ctsh    | cathepsin H                        | -1.97 | 6.70E-02 |
| Tpp1    | tripeptidyl peptidase I            | -2.52 | 4.90E-03 |
| Naga    | N-acetyl galactosaminidase, alpha  | -1.56 | 2.74E-02 |
| Glb1    | galactosidase, beta 1              | -1.49 | 3.99E-02 |
| Galc    | galactosylceramidase               | -1.48 | 4.84E-02 |
| Manba   | mannosidase, beta A, lysosomal     | -1.70 | 5.50E-02 |
| Neu1    | neuraminidase 1                    | -2.50 | 4.90E-02 |
| Gns     | glucosamine (N-acetyl)-6-sulfatase | -1.55 | 2.69E-02 |
| Ids     | iduronate 2-sulfatase              | -1.73 | 2.82E-02 |
| Lipa    | lysosomal acid lipase A            | -4.66 | 3.28E-03 |
| Dnase2a | deoxyribonuclease II alpha         | -2.14 | 5.29E-02 |
| Ppt1    | palmitoyl-protein thioesterase 1   | -2.40 | 5.43E-02 |
| Psap    | prosaposin                         | -1.82 | 5.36E-02 |
| Sort1   | sortilin 1                         | -2.07 | 3.79E-03 |

**S1 Table**
