# Supplementary material for: Rac1 controls cell turnover and reversibility of the involution process in postpartum mammary glands
Source: PubMed Central journal article supplement (PMC9851507; doi:10.1371/journal.pbio.3001583), 2023-01-19
Supplement: pbio.3001583.s006.pdf [file pbio.3001583.s006.pdf]

S2 Table: Antibody information

| <b>ANTIBODY</b>                    | <b>SOURCE</b>                             | <b>IF</b>   | <b>IB</b> |
|------------------------------------|-------------------------------------------|-------------|-----------|
| Calnexin                           | Bioquote SPA-#SPC-108A/B                  |             | 1;4000    |
| Cleaved caspase-3                  | Cell Signalling Technology #9661          | 1;100       | 1;50      |
| Cytokeratin 8/18                   | Progen #GP11                              | 1;200       |           |
| F4:80 macrophage                   | Serotec #MCA497GA                         | 1;200       |           |
| Green fluorescent protein          | Invitrogen #A11122                        | 1;200       | 1;2000    |
| Ki67 (clone SP6) Rabbit polyclonal | Acris #DRM004                             | 1;200       |           |
| Ki-67 mouse monoclonal antibody    | Fisher Scientific UK Ltd #15367074        | 0.180555556 |           |
| LC3B antibody                      | Cell Signalling Technology #2775S         | 1;200       | 1;1000    |
| Rac1 (clone 23A8)                  | Merck Millipore #05-389                   |             | 1;1000    |
| Smooth muscle actin (clone 1A4)    | Sigma #A2547                              | 1;500       |           |
| Bromodeoxyuridine/BrdU (BU20a)     | BIO-TECHNE LTD (Novus Bio) #NBP2-32922-0. | 0.180555556 |           |
